# Supplementary material for: Tribological properties of oleic acid-modified zinc oxide nanoparticles as the lubricant additive in poly-alpha olefin and diisooctyl sebacate base oils
Source: Royal Society of Chemistry journal article supplement (doi:10.1039/c6ra10042b), 2016-01-01
Supplement: c6ra10042b1.pdf [file c6ra10042b1.pdf]

## Supplementary Materials

### **Tribological Properties of Oleic Acid-modified Zinc Oxide Nanoparticles as the Lubricant Additive in Poly-alpha Olefin and Diisooctyl Sebacate Base Oils**

Lili Wu, Yujuan Zhang, Guangbin Yang, Shengmao Zhang, Laigui Yu, Pingyu Zhang

Engineering Research Center for Nanomaterials, Henan University, Kaifeng 475004, China

China. E-mail: zsm@henu.edu.cn; Tel: +86 37125152066

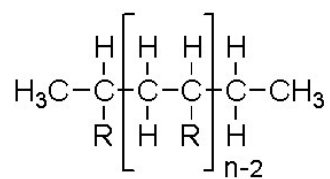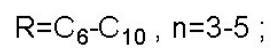

**Figure S1.** The structure of PAO.

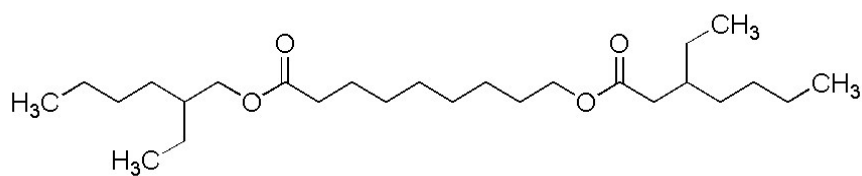

**Figure S2.** The structure of DIOS

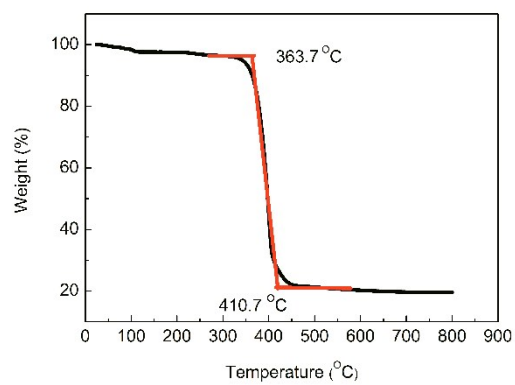

**Figure S3.** TGA curve of OA-modified ZnO nanoparticles.

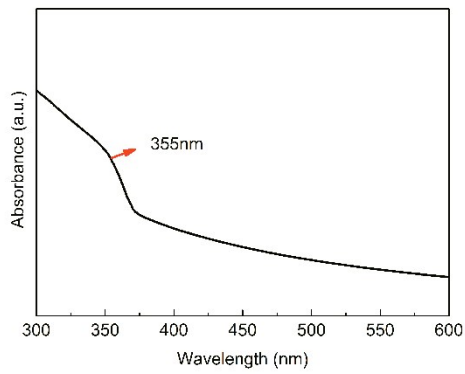

**Figure S4.** UV-vis spectrum of OA-modified ZnO nanoparticles.

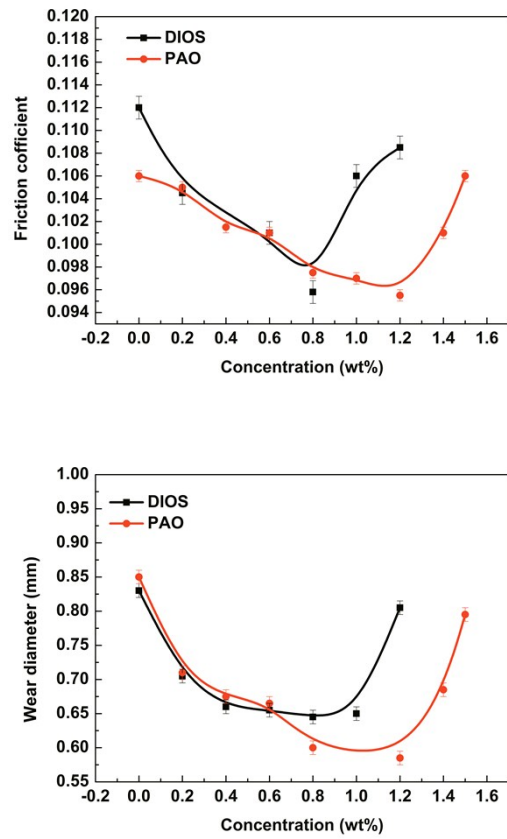

**Figure S5.** Variations in friction coefficient and wear scar diameter of the steel-steel sliding pair with the concentration of OA-modified ZnO nanoparticles in DIOS and PAO (load: 392 N; speed: 1200 rev/min; time: 60 min; temperature: 75 °C).

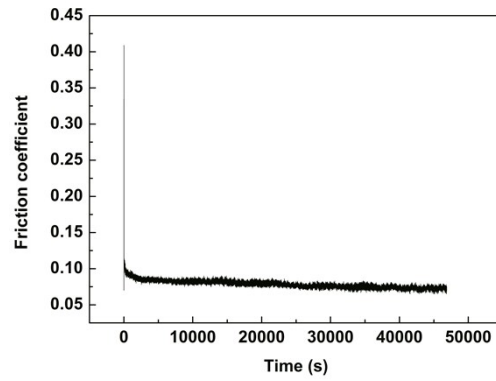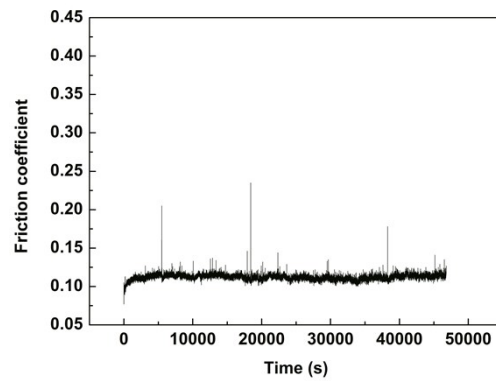

**Figure S6.** The friction coefficient-time curves of PAO with 1.20% OA-modified ZnO and DIOS with 0.80% OA-modified ZnO nanoparticles (load: 392 N; rotation speed: 1200 rev/min; time: 780 min).

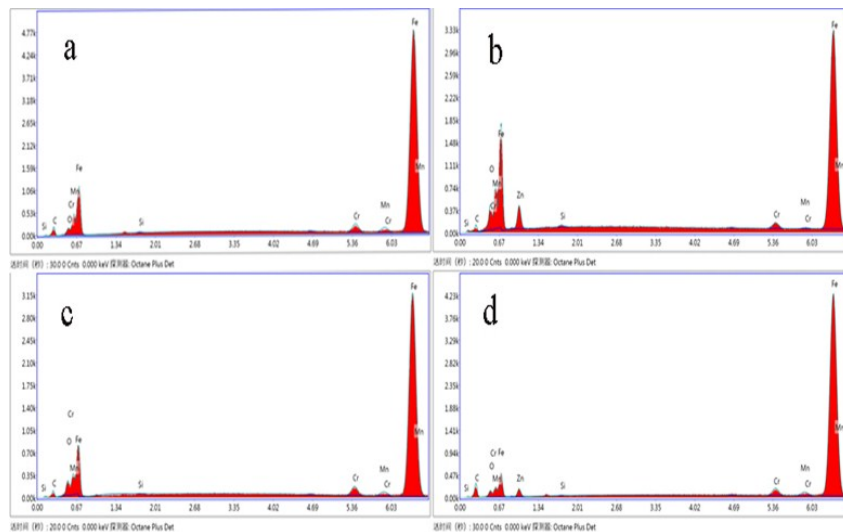

**Figure S7.** EDS spectra of the worn steel surfaces lubricated by PAO (a), the suspension of OA-modified ZnO nanoparticles in PAO ((b); additive concentration 1.20%), DIOS (c), and the suspension of OA-modified ZnO nanoparticles in DIOS ((d); additive concentration 0.80%).
